# Supplementary material for: Detailed bladder cancer immunoprofiling reveals new clues for immunotherapeutic strategies
Source: PubMed Central journal article supplement — Clin Transl Immunology. 2022 Sep 3;11(9):e1402. doi: 10.1002/cti2.1402 (PMC9440624; doi:10.1002/cti2.1402), 2022-09-03
Supplement: CTI2-11-e1402-s001.pdf [file CTI2-11-e1402-s001.pdf]

Supplementary figures

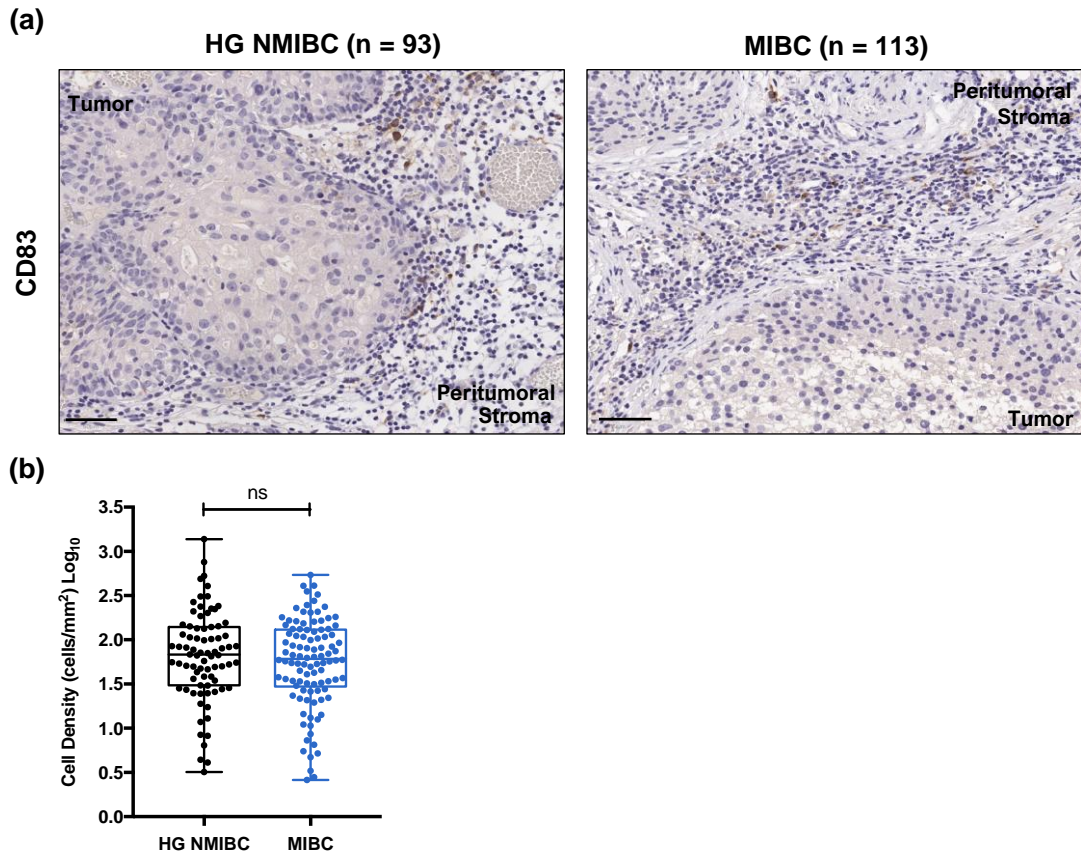

**Supplementary figure 1 – CD83 expression is similar in HG NMIBC and MIBC. (a)** Representative examples of CD83 staining in HG NMIBC and MIBC tissue specimens. Notice the absence of staining in the intratumoral area. Scale bar, 50  $\mu$ m. **(b)** Distribution of CD83<sup>+</sup> cells density per mm<sup>2</sup> in HG NMIBC (n = 93) and MIBC (n = 113) samples. The number of positive cells per mm<sup>2</sup> was calculated with QuPath's *Positive Cell Detection* tool. *P*-values from the non-parametric Mann-Whitney *U*-test; ns *P* > 0.05. HG NMIBC – high-grade non-muscle invasive bladder cancer; MIBC – muscle-invasive bladder cancer.

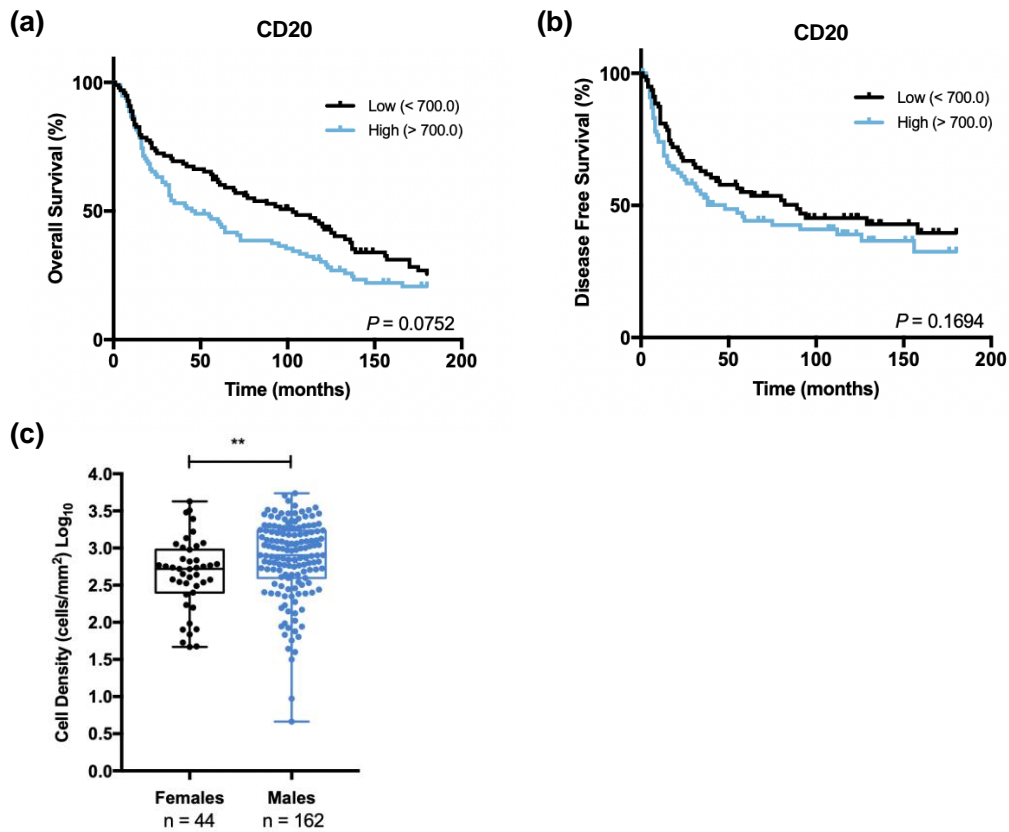

**Supplementary figure 2 – Higher CD20 expression tends to associate with shortened OS and DFS.** Kaplan-Meier estimates of OS (a) and DFS (b) in BICa patients stratified by CD20 expression. Dichotomization into low and high expression was based on the median value. (c) Distribution of CD20<sup>+</sup> cells density in samples from female (n = 44) and male (n = 162) individuals. \*\* $P < 0.01$ .

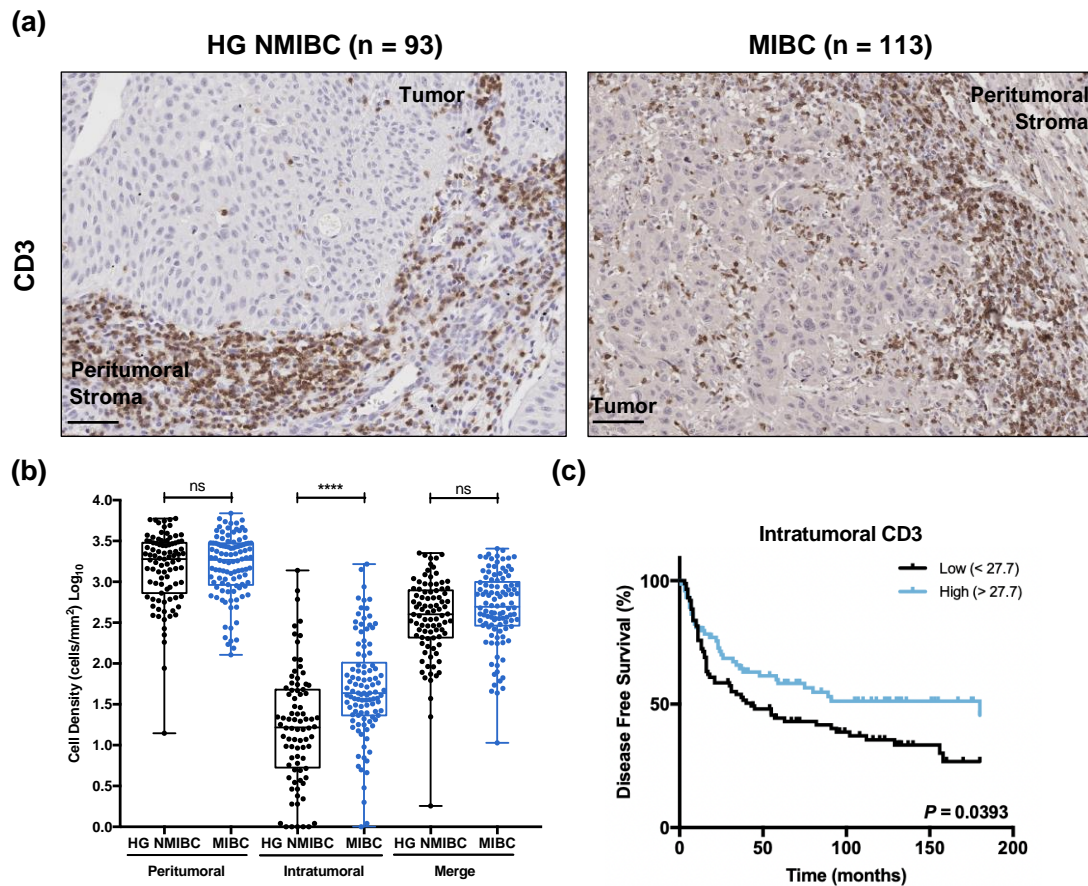

**Supplementary figure 3 – Differential distribution of CD3<sup>+</sup> cells within the tumor landscape. Tumor infiltration of CD3<sup>+</sup> cells benefits patients' prognosis.** (a) Representative examples of CD3 staining in HG NMIBC and MIBC tissue specimens. Notice the increased intratumoral infiltration in MIBC samples. Scale bar, 50  $\mu$ m. (b) Distribution of CD3<sup>+</sup> cells density in HG NMIBC (n = 93) and MIBC (n = 113) samples. The number of positive cells per mm<sup>2</sup> was calculated with QuPath's *Positive Cell Detection* tool. "Merge" refers to the whole-slide evaluation, considering peritumoral and intratumoral regions together. P-values from the non-parametric Mann-Whitney U-test; ns  $P > 0.05$ , \*\*\*\* $P < 0.0001$ . (c) Kaplan-Meier estimates of DFS in BICa patients stratified by intratumoral CD3 expression. Dichotomization into low and high expression was based on the median value. P-values were assessed by the log-rank test. HG NMIBC – high-grade non-muscle invasive bladder cancer; MIBC – muscle-invasive bladder cancer.

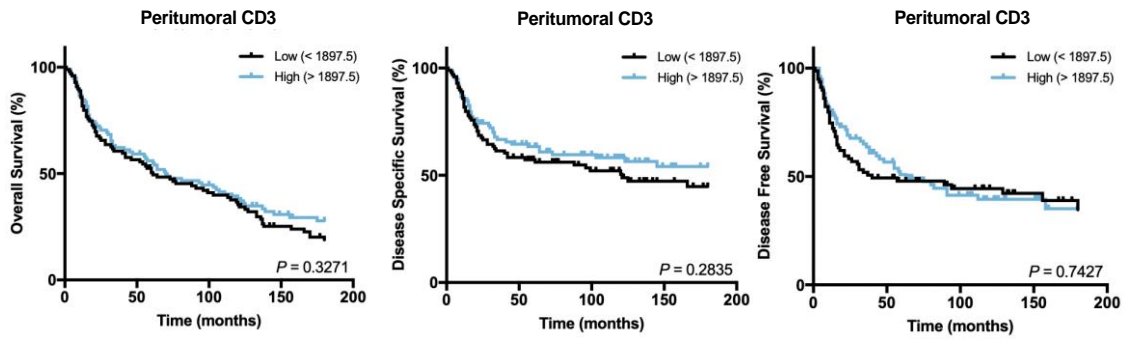

**Supplementary figure 4 – Peritumoral CD3<sup>+</sup> cells do not influence patients’ prognosis.** Kaplan-Meier estimates of OS, DSS and DFS in BICa patients stratified by peritumoral CD3 expression. Dichotomization into low and high expression was based on the median value.

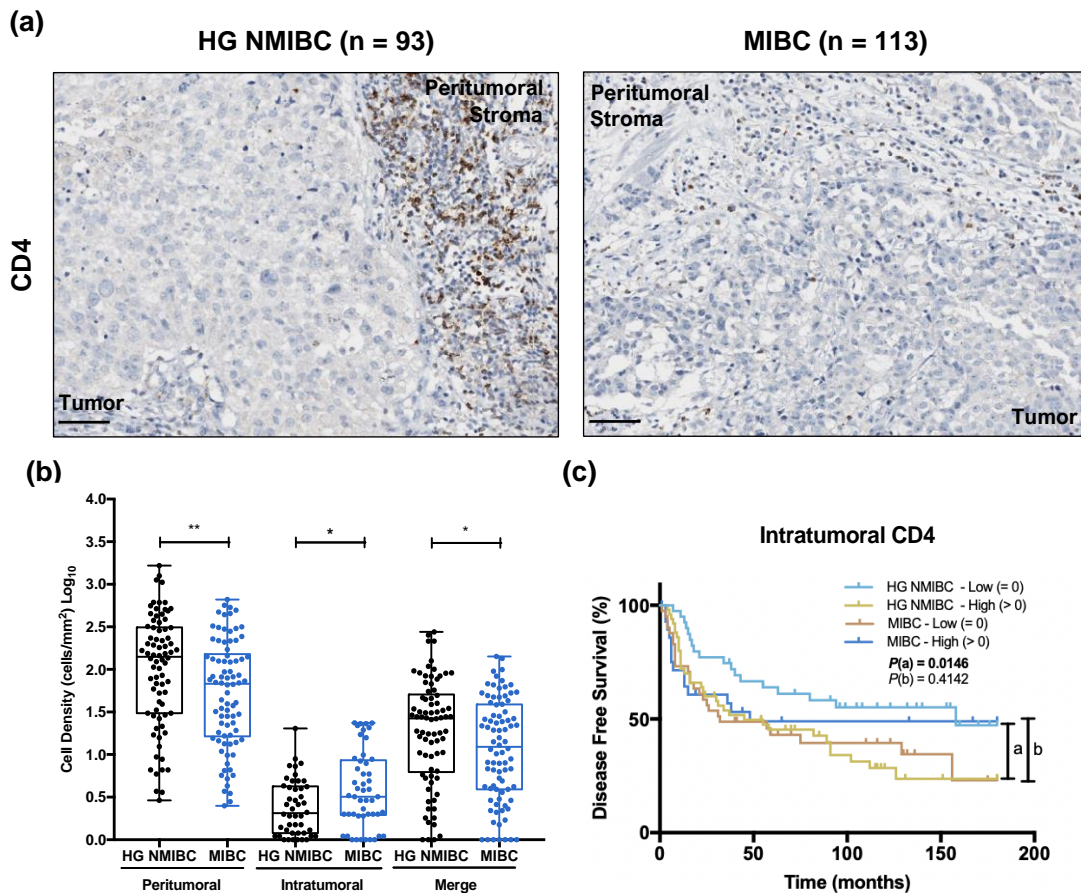

Supplementary figure 5 – CD4 distribution pattern differs between tissue compartments and intratumoral infiltration correlates with worse prognosis, especially in NMIBC. (a) Representative examples of CD4 staining in HG NMIBC and MIBC tissue specimens. Notice the increased peritumoral staining in HG NMIBC samples and the slightly higher tumor infiltration in MIBC. Scale bar, 50  $\mu$ m. (b) Distribution of CD4<sup>+</sup> cells density in HG NMIBC (n = 93) and MIBC (n = 113) samples. The number of positive cells per mm<sup>2</sup> was calculated with QuPath's *Positive Cell Detection* tool. “Merge” refers to the whole-slide evaluation, considering peritumoral and intratumoral regions together. *P*-values from the non-parametric Mann-Whitney *U*-test; \**P* < 0.05, \*\**P* < 0.01. (c) Stratified Kaplan-Meier analyses of DFS according to intratumoral CD4 expression and “HG NMIBC vs MIBC” classification. a – Comparison between “HG NMIBC Low” and “HG NMIBC High”; b – Comparison between “MIBC Low” and “MIBC High”. Dichotomization into low and high expression was based on the median value. *P*-values were assessed by the log-rank test. HG NMIBC – high-grade non-muscle invasive bladder cancer; MIBC – muscle-invasive bladder cancer.



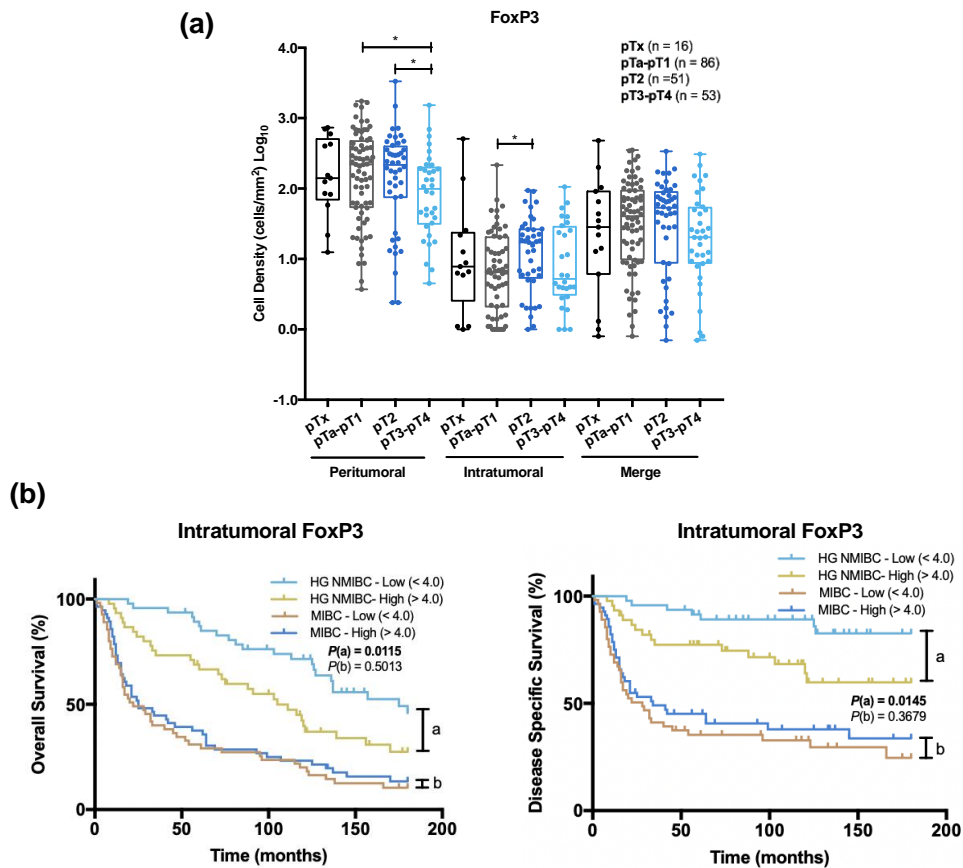

**Supplementary figure 6 – Different distribution of FoxP3<sup>+</sup> cells between tissue compartments. Tumor-infiltrating FoxP3<sup>+</sup> cells negatively influence prognosis, particularly in HG NMIBC. (a)** Distribution of FoxP3<sup>+</sup> cells density in pTx (n = 16), pTa-pT1 (n = 86), pT2 (n = 51) and pT3-pT4 (n = 53) neoplasms. “Merge” refers to the whole-slide evaluation, considering peritumoral and intratumoral regions together. *P*-values from the non-parametric Mann-Whitney *U*-test; only significant associations (*P* < 0.05) are denoted for simplification purposes - \**P* < 0.051. **(b)** Stratified Kaplan-Meier analyses of OS and DSS according to intratumoral FoxP3 expression and “HG NMIBC vs MIBC” classification. a – Comparison between “HG NMIBC Low” and “HG NMIBC High”; b – Comparison between “MIBC Low” and “MIBC High”. Dichotomization into low and high expression was based on the median value. *P*-values were assessed by the log-rank test. HG NMIBC – high-grade non-muscle invasive bladder cancer; MIBC – muscle-invasive bladder cancer.

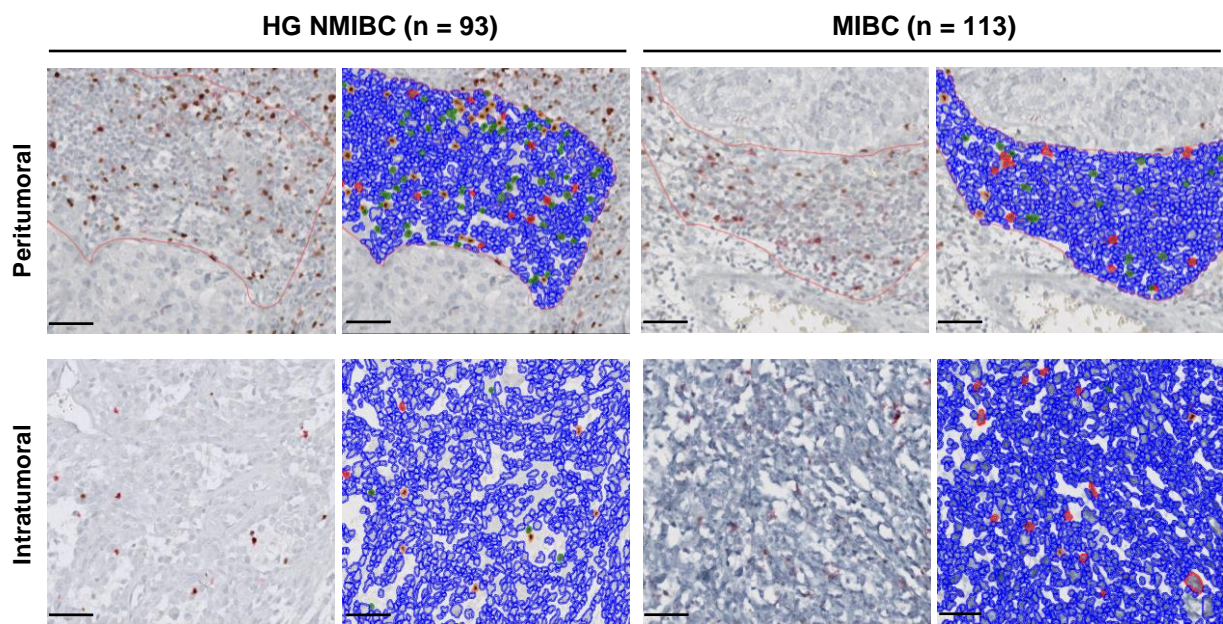

**Supplementary figure 7** - Representative examples of peritumoral and intratumoral FoxP3/ICOS double-staining in HG NMIBC and MIBC tissue specimens. Each image is followed by the respective evaluation obtained with QuPath's *Object classification* tool (green = single FoxP3<sup>+</sup> cells; red = single ICOS<sup>+</sup> cells; orange = FoxP3<sup>+</sup>ICOS<sup>+</sup> cells). Notice the increased proportions of peritumoral FoxP3<sup>+</sup>ICOS<sup>+</sup> cells in HG NMIBC samples and intratumoral single ICOS<sup>+</sup> cells in MIBC samples. Scale bar, 50  $\mu$ m. HG NMIBC – high-grade non-muscle invasive bladder cancer; MIBC – muscle-invasive bladder cancer.

## Supplementary tables

**Supplementary table 1.** Cox-regression analyses to assess the predictive value of immunological markers for OS.

| OS                  | Unadjusted         |              | Adjusted*         |         |
|---------------------|--------------------|--------------|-------------------|---------|
|                     | HR (95% CI)        | P-value      | HR (95% CI)       | P-value |
| <b>CD83</b>         |                    |              |                   |         |
| Low                 | 1.00 (Reference)   |              | 1.00 (Reference)  |         |
| High                | 0.92 (0.66-1.28)   | 0.622        | 0.93 (0.67-1.29)  | 0.650   |
| <b>CD20</b>         |                    |              |                   |         |
| Low                 | 1.00 (Reference)   |              | 1.00 (Reference)  |         |
| High                | 1.34 (0.968-1.864) | 0.078        | 1.06 (0.75-1.48)  | 0.751   |
| <b>CD68</b>         |                    |              |                   |         |
| <b>Intratumoral</b> |                    |              |                   |         |
| Low                 | 1.00 (Reference)   |              | 1.00 (Reference)  |         |
| High                | 1.45 (1.06-2.00)   | <b>0.022</b> | 0.90 (0.63-1.29)  | 0.560   |
| <b>Peritumoral</b>  |                    |              |                   |         |
| Low                 | 1.00 (Reference)   |              | 1.00 (Reference)  |         |
| High                | 1.29 (0.93-1.79)   | 0.122        | 0.91 (0.64-1.28)  | 0.574   |
| <b>Merge</b>        |                    |              |                   |         |
| Low                 | 1.00 (Reference)   |              | 1.00 (Reference)  |         |
| High                | 1.34 (0.96-1.85)   | 0.081        | 0.89 (0.62-1.26)  | 0.506   |
| <b>CD163</b>        |                    |              |                   |         |
| <b>Intratumoral</b> |                    |              |                   |         |
| Low                 | 1.00 (Reference)   |              | 1.00 (Reference)  |         |
| High                | 1.23 (0.89-1.69)   | 0.207        | 0.77 (0.54-1.09)  | 0.143   |
| <b>Peritumoral</b>  |                    |              |                   |         |
| Low                 | 1.00 (Reference)   |              | 1.00 (Reference)  |         |
| High                | 1.21 (0.87-1.67)   | 0.258        | 1.00 (0.717-1.38) | 0.985   |
| <b>Merge</b>        |                    |              |                   |         |
| Low                 | 1.00 (Reference)   |              | 1.00 (Reference)  |         |
| High                | 1.47 (1.06-2.04)   | <b>0.020</b> | 1.07 (0.76-1.50)  | 0.708   |
| <b>CD3</b>          |                    |              |                   |         |
| <b>Intratumoral</b> |                    |              |                   |         |
| Low                 | 1.00 (Reference)   |              | 1.00 (Reference)  |         |
| High                | 1.10 (0.80-1.51)   | 0.573        | 0.74 (0.52-1.04)  | 0.081   |
| <b>Peritumoral</b>  |                    |              |                   |         |
| Low                 | 1.00 (Reference)   |              | 1.00 (Reference)  |         |
| High                | 0.85 (0.61-1.80)   | 0.330        | 0.92 (0.67-1.28)  | 0.640   |
| <b>Merge</b>        |                    |              |                   |         |
| Low                 | 1.00 (Reference)   |              | 1.00 (Reference)  |         |
| High                | 0.97 (0.70-1.35)   | 0.972        | 0.93 (0.67-1.29)  | 0.682   |
| <b>CD8</b>          |                    |              |                   |         |
| <b>Intratumoral</b> |                    |              |                   |         |
| Low                 | 1.00 (Reference)   |              | 1.00 (Reference)  |         |
| High                | 1.09 (0.79-1.51)   | 0.583        | 0.769 (0.55-1.08) | 0.131   |
| <b>Peritumoral</b>  |                    |              |                   |         |
| Low                 | 1.00 (Reference)   |              | 1.00 (Reference)  |         |
| High                | 1.02 (0.73-1.41)   | 0.916        | 0.96 (0.69-1.33)  | 0.783   |
| <b>Merge</b>        |                    |              |                   |         |
| Low                 | 1.00 (Reference)   |              | 1.00 (Reference)  |         |
| High                | 1.14 (0.82-1.58)   | 0.444        | 0.89 (0.64-1.25)  | 0.512   |
| <b>CD4</b>          |                    |              |                   |         |
| <b>Intratumoral</b> |                    |              |                   |         |
| Low                 | 1.00 (Reference)   |              | 1.00 (Reference)  |         |
| High                | 0.92 (0.67-1.27)   | 0.617        | 0.96 (0.70-1.33)  | 0.830   |
| <b>Peritumoral</b>  |                    |              |                   |         |
| Low                 | 1.00 (Reference)   |              | 1.00 (Reference)  |         |
| High                | 0.90 (0.65-1.25)   | 0.526        | 1.14 (0.82-1.59)  | 0.450   |



|                     |                   |       |                  |              |
|---------------------|-------------------|-------|------------------|--------------|
| <b>Merge</b>        |                   |       |                  |              |
| Low                 | 1.00 (Reference)  |       | 1.00 (Reference) |              |
| High                | 0.91 (0.66-1.27)  | 0.591 | 1.12 (0.80-1.56) | 0.505        |
| <b>FoxP3</b>        |                   |       |                  |              |
| <b>Intratumoral</b> |                   |       |                  |              |
| Low                 | 1.00 (Reference)  |       | 1.00 (Reference) |              |
| High                | 1.245 (0.90-1.72) | 0.175 | 1.15 (0.83-1.59) | 0.406        |
| <b>Peritumoral</b>  |                   |       |                  |              |
| Low                 | 1.00 (Reference)  |       | 1.00 (Reference) |              |
| High                | 0.91 (0.65-1.26)  | 0.563 | 1.02 (0.73-1.42) | 0.926        |
| <b>Merge</b>        |                   |       |                  |              |
| Low                 | 1.00 (Reference)  |       | 1.00 (Reference) |              |
| High                | 1.00 (0.72-1.39)  | 0.984 | 1.07 (0.77-1.49) | 0.675        |
| <b>ICOS</b>         |                   |       |                  |              |
| <b>Intratumoral</b> |                   |       |                  |              |
| Low                 | 1.00 (Reference)  |       | 1.00 (Reference) |              |
| High                | 1.20 (0.87-1.65)  | 0.268 | 0.83 (0.59-1.18) | 0.301        |
| <b>Peritumoral</b>  |                   |       |                  |              |
| Low                 | 1.00 (Reference)  |       | 1.00 (Reference) |              |
| High                | 0.82 (0.59-1.5)   | 0.256 | 0.83 (0.59-1.15) | 0.261        |
| <b>Merge</b>        |                   |       |                  |              |
| Low                 | 1.00 (Reference)  |       | 1.00 (Reference) |              |
| High                | 0.76 (0.55-1.06)  | 0.109 | 0.61 (0.43-0.86) | <b>0.004</b> |
| <b>FoxP3 + ICOS</b> |                   |       |                  |              |
| <b>Intratumoral</b> |                   |       |                  |              |
| Low                 | 1.00 (Reference)  |       | 1.00 (Reference) |              |
| High                | 1.24 (0.90-1.71)  | 0.197 | 1.12 (0.81-1.54) | 0.497        |
| <b>Peritumoral</b>  |                   |       |                  |              |
| Low                 | 1.00 (Reference)  |       | 1.00 (Reference) |              |
| High                | 0.84 (0.61-1.18)  | 0.318 | 0.94 (0.68-1.32) | 0.734        |
| <b>Merge</b>        |                   |       |                  |              |
| Low                 | 1.00 (Reference)  |       | 1.00 (Reference) |              |
| High                | 1.08 (0.78-1.50)  | 0.650 | 1.06 (0.76-1.47) | 0.739        |
| <b>PD-L1</b>        |                   |       |                  |              |
| Low                 | 1.00 (Reference)  |       | 1.00 (Reference) |              |
| High                | 0.91 (0.66-1.25)  | 0.557 | 1.05 (0.76-1.45) | 0.753        |

\*Multivariable model, adjusted for “HG NMIBC vs MIBC” classification. OS – Overall Survival; HR – Hazard Ratio; CI – Confidence Interval.

**Supplementary table 2.** Cox-regression analyses to assess the predictive value of immunological markers for DSS.

| DSS                 | Unadjusted        |              | Adjusted*        |              |
|---------------------|-------------------|--------------|------------------|--------------|
|                     | HR (95% CI)       | P-value      | HR (95% CI)      | P-value      |
| <b>CD83</b>         |                   |              |                  |              |
| Low                 | 1.00 (Reference)  |              | 1.00 (Reference) |              |
| High                | 0.94 (0.62-1.42)  | 0.770        | 0.92 (0.61-1.40) | 0.702        |
| <b>CD20</b>         |                   |              |                  |              |
| Low                 | 1.00 (Reference)  |              | 1.00 (Reference) |              |
| High                | 1.69 (1.11-2.57)  | <b>0.015</b> | 1.19 (0.77-1.84) | 0.426        |
| <b>CD68</b>         |                   |              |                  |              |
| <b>Intratumoral</b> |                   |              |                  |              |
| Low                 | 1.00 (Reference)  |              | 1.00 (Reference) |              |
| High                | 1.71 (1.14-2.56)  | <b>0.009</b> | 0.90 (0.58-1.40) | 0.626        |
| <b>Peritumoral</b>  |                   |              |                  |              |
| Low                 | 1.00 (Reference)  |              | 1.00 (Reference) |              |
| High                | 1.54 (1.02-2.34)  | <b>0.040</b> | 0.94 (0.61-1.46) | 0.785        |
| <b>Merge</b>        |                   |              |                  |              |
| Low                 | 1.00 (Reference)  |              | 1.00 (Reference) |              |
| High                | 1.58 (1.04-2.38)  | <b>0.030</b> | 0.88 (0.57-1.38) | 0.585        |
| <b>CD163</b>        |                   |              |                  |              |
| <b>Intratumoral</b> |                   |              |                  |              |
| Low                 | 1.00 (Reference)  |              | 1.00 (Reference) |              |
| High                | 1.33 (0.89-1.99)  | 0.161        | 0.73 (0.48-1.12) | 0.151        |
| <b>Peritumoral</b>  |                   |              |                  |              |
| Low                 | 1.00 (Reference)  |              | 1.00 (Reference) |              |
| High                | 1.17 (0.78-1.76)  | 0.447        | 0.90 (0.60-1.37) | 0.646        |
| <b>Merge</b>        |                   |              |                  |              |
| Low                 | 1.00 (Reference)  |              | 1.00 (Reference) |              |
| High                | 1.509 (1.00-2.28) | <b>0.048</b> | 0.973 (0.63-150) | 0.900        |
| <b>CD3</b>          |                   |              |                  |              |
| <b>Intratumoral</b> |                   |              |                  |              |
| Low                 | 1.00 (Reference)  |              | 1.00 (Reference) |              |
| High                | 1.11 (0.74-1.66)  | 0.616        | 0.65 (0.42-0.99) | <b>0.043</b> |
| <b>Peritumoral</b>  |                   |              |                  |              |
| Low                 | 1.00 (Reference)  |              | 1.00 (Reference) |              |
| High                | 0.80 (0.53-1.21)  | 0.287        | 0.84 (0.56-1.27) | 0.406        |
| <b>Merge</b>        |                   |              |                  |              |
| Low                 | 1.00 (Reference)  |              | 1.00 (Reference) |              |
| High                | 0.90 (0.60-1.36)  | 0.612        | 0.83 (0.55-1.25) | 0.373        |
| <b>CD8</b>          |                   |              |                  |              |
| <b>Intratumoral</b> |                   |              |                  |              |
| Low                 | 1.00 (Reference)  |              | 1.00 (Reference) |              |
| High                | 1.16 (0.78-1.74)  | 0.456        | 0.78 (0.51-1.18) | 0.237        |
| <b>Peritumoral</b>  |                   |              |                  |              |
| Low                 | 1.00 (Reference)  |              | 1.00 (Reference) |              |
| High                | 1.11 (0.73-1.68)  | 0.618        | 1.00 (0.66-1.52) | 1.000        |
| <b>Merge</b>        |                   |              |                  |              |
| Low                 | 1.00 (Reference)  |              | 1.00 (Reference) |              |
| High                | 1.30 (0.86-1.97)  | 0.217        | 0.95 (0.62-1.45) | 0.806        |
| <b>CD4</b>          |                   |              |                  |              |
| <b>Intratumoral</b> |                   |              |                  |              |
| Low                 | 1.00 (Reference)  |              | 1.00 (Reference) |              |
| High                | 0.99 (0.67-1.48)  | 0.976        | 1.10 (0.74-1.65) | 0.628        |
| <b>Peritumoral</b>  |                   |              |                  |              |
| Low                 | 1.00 (Reference)  |              | 1.00 (Reference) |              |
| High                | 0.87 (0.58-1.31)  | 0.505        | 1.20 (0.79-1.83) | 0.386        |
| <b>Merge</b>        |                   |              |                  |              |
| Low                 | 1.00 (Reference)  |              | 1.00 (Reference) |              |
| High                | 0.84 (0.56-1.26)  | 0.399        | 1.10 (0.74-1.67) | 0.652        |
| <b>FoxP3</b>        |                   |              |                  |              |

|                     |                  |              |                  |              |
|---------------------|------------------|--------------|------------------|--------------|
| <b>Intratumoral</b> |                  |              |                  |              |
| Low                 | 1.00 (Reference) |              | 1.00 (Reference) |              |
| High                | 1.17 (0.78-1.76) | 0.444        | 1.06 (0.71-1.59) | 0.779        |
| <b>Peritumoral</b>  |                  |              |                  |              |
| Low                 | 1.00 (Reference) |              | 1.00 (Reference) |              |
| High                | 0.78 (0.52-1.19) | 0.256        | 0.90 (0.59-1.37) | 0.626        |
| <b>Merge</b>        |                  |              |                  |              |
| Low                 | 1.00 (Reference) |              | 1.00 (Reference) |              |
| High                | 0.87 (0.57-1.32) | 0.505        | 0.94 (0.62-1.43) | 0.776        |
| <b>ICOS</b>         |                  |              |                  |              |
| <b>Intratumoral</b> |                  |              |                  |              |
| Low                 | 1.00 (Reference) |              | 1.00 (Reference) |              |
| High                | 1.18 (0.79-1.78) | 0.411        | 0.74 (0.48-1.13) | 0.159        |
| <b>Peritumoral</b>  |                  |              |                  |              |
| Low                 | 1.00 (Reference) |              | 1.00 (Reference) |              |
| High                | 0.80 (0.52-1.21) | 0.293        | 0.81 (0.54-1.24) | 0.338        |
| <b>Merge</b>        |                  |              |                  |              |
| Low                 | 1.00 (Reference) |              | 1.00 (Reference) |              |
| High                | 0.71 (0.47-1.09) | 0.117        | 0.54 (0.36-0.84) | <b>0.005</b> |
| <b>FoxP3 + ICOS</b> |                  |              |                  |              |
| <b>Intratumoral</b> |                  |              |                  |              |
| Low                 | 1.00 (Reference) |              | 1.00 (Reference) |              |
| High                | 1.04 (0.69-1.56) | 0.849        | 0.93 (0.62-1.40) | 0.728        |
| <b>Peritumoral</b>  |                  |              |                  |              |
| Low                 | 1.00 (Reference) |              | 1.00 (Reference) |              |
| High                | 0.61 (0.40-0.93) | <b>0.023</b> | 0.71 (0.46-1.09) | 0.114        |
| <b>Merge</b>        |                  |              |                  |              |
| Low                 | 1.00 (Reference) |              | 1.00 (Reference) |              |
| High                | 0.82 (0.54-1.24) | 0.343        | 0.80 (0.53-1.22) | 0.308        |
| <b>PD-L1</b>        |                  |              |                  |              |
| Low                 | 1.00 (Reference) |              | 1.00 (Reference) |              |
| High                | 1.10 (0.73-1.63) | 0.658        | 1.34 (0.89-2.00) | 0.160        |

\*Multivariable model, adjusted for “HG NMIBC vs MIBC” classification. DSS – Disease-Specific Survival; HR – Hazard Ratio; CI – Confidence Interval.

**Supplementary table 3.** Cox-regression analyses to assess the predictive value of immunological markers for DFS.

| DFS                 | Unadjusted       |              | Adjusted*        |              |
|---------------------|------------------|--------------|------------------|--------------|
|                     | HR (95% CI)      | P-value      | HR (95% CI)      | P-value      |
| <b>CD83</b>         |                  |              |                  |              |
| Low                 | 1.00 (Reference) |              | 1.00 (Reference) |              |
| High                | 1.11 (0.73-1.69) | 0.629        | 1.11 (0.73-1.70) | 0.619        |
| <b>CD20</b>         |                  |              |                  |              |
| Low                 | 1.00 (Reference) |              | 1.00 (Reference) |              |
| High                | 1.27 (0.84-1.93) | 0.253        | 1.24 (0.81-1.90) | 0.316        |
| <b>CD68</b>         |                  |              |                  |              |
| <b>Intratumoral</b> |                  |              |                  |              |
| Low                 | 1.00 (Reference) |              | 1.00 (Reference) |              |
| High                | 0.94 (0.62-1.42) | 0.770        | 0.84 (0.51-1.37) | 0.476        |
| <b>Peritumoral</b>  |                  |              |                  |              |
| Low                 | 1.00 (Reference) |              | 1.00 (Reference) |              |
| High                | 1.12 (0.74-1.69) | 0.595        | 1.06 (0.68-1.65) | 0.793        |
| <b>Merge</b>        |                  |              |                  |              |
| Low                 | 1.00 (Reference) |              | 1.00 (Reference) |              |
| High                | 1.12 (0.74-1.68) | 0.604        | 1.05 (0.66-1.68) | 0.822        |
| <b>CD163</b>        |                  |              |                  |              |
| <b>Intratumoral</b> |                  |              |                  |              |
| Low                 | 1.00 (Reference) |              | 1.00 (Reference) |              |
| High                | 1.14 (0.75-1.71) | 0.544        | 1.09 (0.68-1.75) | 0.708        |
| <b>Peritumoral</b>  |                  |              |                  |              |
| Low                 | 1.00 (Reference) |              | 1.00 (Reference) |              |
| High                | 1.22 (0.81-1.84) | 0.339        | 1.19 (0.78-1.81) | 0.410        |
| <b>Merge</b>        |                  |              |                  |              |
| Low                 | 1.00 (Reference) |              | 1.00 (Reference) |              |
| High                | 1.20 (0.80-1.81) | 0.381        | 1.16 (0.75-1.80) | 0.496        |
| <b>CD3</b>          |                  |              |                  |              |
| <b>Intratumoral</b> |                  |              |                  |              |
| Low                 | 1.00 (Reference) |              | 1.00 (Reference) |              |
| High                | 0.65 (0.42-0.99) | <b>0.044</b> | 0.58 (0.37-0.91) | <b>0.018</b> |
| <b>Peritumoral</b>  |                  |              |                  |              |
| Low                 | 1.00 (Reference) |              | 1.00 (Reference) |              |
| High                | 0.98 (0.64-1.47) | 0.909        | 0.98 (0.65-1.49) | 0.943        |
| <b>Merge</b>        |                  |              |                  |              |
| Low                 | 1.00 (Reference) |              | 1.00 (Reference) |              |
| High                | 0.85 (0.56-1.29) | 0.452        | 0.84 (0.56-1.28) | 0.424        |
| <b>CD8</b>          |                  |              |                  |              |
| <b>Intratumoral</b> |                  |              |                  |              |
| Low                 | 1.00 (Reference) |              | 1.00 (Reference) |              |
| High                | 0.60 (0.39-0.91) | <b>0.017</b> | 0.54 (0.35-0.84) | <b>0.007</b> |
| <b>Peritumoral</b>  |                  |              |                  |              |
| Low                 | 1.00 (Reference) |              | 1.00 (Reference) |              |
| High                | 0.68 (0.45-1.04) | 0.075        | 0.67 (0.44-1.03) | 0.066        |
| <b>Merge</b>        |                  |              |                  |              |
| Low                 | 1.00 (Reference) |              | 1.00 (Reference) |              |
| High                | 0.62 (0.40-0.94) | <b>0.027</b> | 0.58 (0.37-0.90) | <b>0.015</b> |
| <b>CD4</b>          |                  |              |                  |              |
| <b>Intratumoral</b> |                  |              |                  |              |
| Low                 | 1.00 (Reference) |              | 1.00 (Reference) |              |
| High                | 1.24 (.82-1.87)  | 0.305        | 1.25 (0.83-1.89) | 0.283        |
| <b>Peritumoral</b>  |                  |              |                  |              |
| Low                 | 1.00 (Reference) |              | 1.00 (Reference) |              |
| High                | 1.32 (0.87-2.00) | 0.186        | 1.40 (0.91-2.14) | 0.125        |
| <b>Merge</b>        |                  |              |                  |              |
| Low                 | 1.00 (Reference) |              | 1.00 (Reference) |              |
| High                | 1.31 (0.87-1.99) | 0.197        | 1.38 (0.90-2.10) | 0.141        |
| <b>FoxP3</b>        |                  |              |                  |              |

|                     |                  |              |  |                  |                   |
|---------------------|------------------|--------------|--|------------------|-------------------|
| <b>Intratumoral</b> |                  |              |  |                  |                   |
| Low                 | 1.00 (Reference) |              |  | 1.00 (Reference) |                   |
| High                | 0.77 (0.51-1.18) | 0.229        |  | 0.76 (0.50-1.16) | 0.207             |
| <b>Peritumoral</b>  |                  |              |  |                  |                   |
| Low                 | 1.00 (Reference) |              |  | 1.00 (Reference) |                   |
| High                | 1.00 (0.66-1.52) | 0.989        |  | 1.01 (0.66-1.54) | 0.959             |
| <b>Merge</b>        |                  |              |  |                  |                   |
| Low                 | 1.00 (Reference) |              |  | 1.00 (Reference) |                   |
| High                | 0.90 (0.59-1.37) | 0.625        |  | 0.91 (0.60-1.38) | 0.643             |
| <b>ICOS</b>         |                  |              |  |                  |                   |
| <b>Intratumoral</b> |                  |              |  |                  |                   |
| Low                 | 1.00 (Reference) |              |  | 1.00 (Reference) |                   |
| High                | 0.98 (0.65-1.49) | 0.942        |  | 0.94 (0.60-1.46) | 0.772             |
| <b>Peritumoral</b>  |                  |              |  |                  |                   |
| Low                 | 1.00 (Reference) |              |  | 1.00 (Reference) |                   |
| High                | 1.18 (0.78-1.80) | 0.436        |  | 1.18 (0.77-1.80) | 0.448             |
| <b>Merge</b>        |                  |              |  |                  |                   |
| Low                 | 1.00 (Reference) |              |  | 1.00 (Reference) |                   |
| High                | 0.85 (0.56-1.29) | 0.447        |  | 0.82 (0.53-1.26) | 0.369             |
| <b>FoxP3 + ICOS</b> |                  |              |  |                  |                   |
| <b>Intratumoral</b> |                  |              |  |                  |                   |
| Low                 | 1.00 (Reference) |              |  | 1.00 (Reference) |                   |
| High                | 1.02 (0.67-1.54) | 0.93         |  | 1.01 (0.67-1.53) | 0.959             |
| <b>Peritumoral</b>  |                  |              |  |                  |                   |
| Low                 | 1.00 (Reference) |              |  | 1.00 (Reference) |                   |
| High                | 1.00 (0.66-1.54) | 0.965        |  | 1.02 (0.67-1.55) | 0.941             |
| <b>Merge</b>        |                  |              |  |                  |                   |
| Low                 | 1.00 (Reference) |              |  | 1.00 (Reference) |                   |
| High                | 0.88 (0.58-1.33) | 0.531        |  | 0.87 (0.57-1.32) | 0.514             |
| <b>PD-L1</b>        |                  |              |  |                  |                   |
| Low                 | 1.00 (Reference) |              |  | 1.00 (Reference) |                   |
| High                | 2.04 (1.33-3.14) | <b>0.001</b> |  | 2.07 (1.35-3.19) | <b>&lt; 0.001</b> |

\*Multivariable model, adjusted for “HG NMIBC vs MIBC” classification. DFS – Disease-Free Survival; HR – Hazard Ratio; CI – Confidence Interval.



**Supplementary table 4.** Primary antibodies used in IHC.

| <b>Antibody</b> | <b>Company</b>                           | <b>Clone</b>    | <b>Species</b> | <b>Dilution</b>                       | <b>Antigen Retrieval</b>                   | <b>Positive Control</b>   | <b>Detection Kit/ Detection System</b>                                                       |
|-----------------|------------------------------------------|-----------------|----------------|---------------------------------------|--------------------------------------------|---------------------------|----------------------------------------------------------------------------------------------|
| <b>CD3</b>      | Leica Biosystems<br>(NCL-L-CD3-565)      | LN10            | Mouse          | 1/200<br>(1h incubation)              | EDTA buffer pH9,<br>20 min,<br>MW (700W)   | Tonsil                    | <i>ultraView</i> Universal<br>DAB Detection Kit / n.a.                                       |
| <b>CD20</b>     | Leica Biosystems<br>(NCL-L-CD20-L26)     | L26             | Mouse          | 1/150<br>(1h incubation)              | EDTA buffer pH9,<br>20 min,<br>MW (700W)   | Tonsil                    | <i>ultraView</i> Universal<br>DAB Detection Kit / n.a.                                       |
| <b>CD68</b>     | Dako<br>(M0876)                          | PG-M1           | Mouse          | 1/150<br>(1h incubation)              | EDTA buffer pH9, 20<br>min,<br>MW (700W)   | Tonsil                    | <i>ultraView</i> Universal<br>DAB Detection Kit / n.a.                                       |
| <b>CD83</b>     | abcam<br>(ab275021)                      | EPR23809-<br>19 | Rabbit         | 1/300<br>(1h incubation)              | EDTA buffer pH9,<br>20 min,<br>MW (700W)   | Tonsil                    | <i>ultraView</i> Universal<br>DAB Detection Kit / n.a.                                       |
| <b>CD163</b>    | Leica Biosystems<br>(NCL-L-CD163)        | 10D6            | Mouse          | Pre-diluted<br>(1h incubation)        | Sodium Citrate buffer<br>pH6,<br>MW (700W) | Spleen                    | <i>ultraView</i> Universal<br>DAB Detection Kit / n.a.                                       |
| <b>ICOS</b>     | Cell Signaling<br>Technology<br>(#89601) | D1K2TTM         | Rabbit         | 1/200<br>(1h incubation)              | CC1,<br>64 min,<br>95°C                    | Colon Carcinoma           | <i>ultraView</i> Universal<br>Alkaline Phosphatase Red Detection<br>Kit /<br>BenchMark ULTRA |
| <b>PD-L1</b>    | Abcam<br>(ab228462)                      | SP142           | Rabbit         | 1/25<br>(1h incubation)               | EDTA buffer pH9,<br>20 min,<br>MW (700W)*  | Tonsil, Lung,<br>Placenta | optiView DAB Detection Kit /<br>BenchMark ULTRA                                              |
| <b>CD8</b>      | Roche<br>(#5937248001)                   | SP57            | Rabbit         | Pre-diluted<br>(16 min<br>incubation) | CC1,<br>64 min,<br>95°C                    | Tonsil                    | <i>ultraView</i> Universal<br>DAB Detection Kit / BenchMark<br>ULTRA                         |
| <b>CD4</b>      | Leica Biosystems<br>(NCL-L-CD4-368)      | 4B12            | Mouse          | 1/100<br>(32 min<br>incubation)       | ER2,<br>60 min,<br>95° C                   | Tonsil                    | optiView DAB Detection Kit /<br>BenchMark ULTRA                                              |
| <b>FoxP3</b>    | Abcam<br>(ab20034)                       | 236A/E7         | Mouse          | 1/100<br>(1h incubation)              | CC1,<br>64 min,<br>95°C                    | Tonsil                    | <i>ultraView</i> Universal DAB Detection<br>Kit /<br>BenchMark ULTRA                         |

\*Manual Antigen Retrieval. CC1 – Cell Conditioning 1; EDTA - Ethylenediamine tetraacetic acid; ER2 - Epitope Retrieval 2; n.a. – non applicable; MW - Microwave; ON – Overnight.
